## RESEARCH ARTICLE

# Evaluation of the sublethal effect of tetrachlorantraniliprole on *Spodoptera exigua* and its potential toxicity to two non-target organisms

Haiyuan Teng<sup>1</sup> , Yongda Yuan<sup>1</sup> , Tianshu Zhang, Xiaoli Chang, Dongsheng Wang<sup>1</sup> 

Institute of Eco-Environmental and Plant Protection, Shanghai Academy of Agricultural Sciences, Shanghai, China

 These authors contributed equally to this work.

\* [zb3@saas.sh.cn](mailto:zb3@saas.sh.cn)

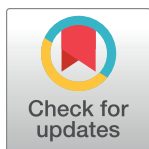

## OPEN ACCESS

**Citation:** Teng H, Yuan Y, Zhang T, Chang X, Wang D (2020) Evaluation of the sublethal effect of tetrachlorantraniliprole on *Spodoptera exigua* and its potential toxicity to two non-target organisms. PLoS ONE 15(11): e0242052. <https://doi.org/10.1371/journal.pone.0242052>

**Editor:** Nicolas Desneux, Institut Sophia Agrobiotech, FRANCE

**Received:** December 20, 2019

**Accepted:** October 27, 2020

**Published:** November 9, 2020

**Copyright:** © 2020 Teng et al. This is an open access article distributed under the terms of the [Creative Commons Attribution License](https://creativecommons.org/licenses/by/4.0/), which permits unrestricted use, distribution, and reproduction in any medium, provided the original author and source are credited.

**Data Availability Statement:** All relevant data are within the paper.

**Funding:** The authors are grateful for the financial support provided by SAAS Program for Excellent Research Team (SPERT2017(A-03)), the Growth of Youth Talents Program of Shanghai Municipal Agricultural Commission (Shanghai Agricultural Youth (2015) No. 1–24) and the promotion project of Developing Agriculture through Science and Technology of the Shanghai Agricultural Committee (Hu nong ke tui zi (2018)No.4-14).The

## Abstract

Tetrachlorantraniliprole (TCAP) is a novel anthranilic diamide insecticide that specifically targets the ryanodine receptors of lepidopteran insect species with excellent insecticidal activity. Previous studies have reported the sublethal effects of multiple diamides on several lepidopteran species, whereas the sublethal and non-target effects of TCAP remain largely unknown. We assessed the sublethal effects of TCAP on *Spodoptera exigua*. We also investigated the effects of TCAP on non-target *Harmonia axyridis* and *Eisenia fetida*. *S. exigua* was more sensitive to TCAP than to chlorantraniliprole, as the  $LC_{50}$  ( $10.371 \mu\text{g L}^{-1}$  at 72 h) of TCAP was relatively lower. Compared with those of the control, sublethal concentrations of TCAP ( $LC_{10}$  and  $LC_{30}$ ) not only prolonged the duration of the larval and pupal stages as well as the mean generation time but also reduced certain population parameters. On the other hand, TCAP exposure, even at the highest concentration, did not induce toxic effects in *H. axyridis* ladybugs (1<sup>st</sup> instar larvae and adults) or *E. fetida* earthworms. Taken together, our results suggest that TCAP can be used as a novel and promising component of the integrated pest management (IPM) program against *S. exigua* due to its robust target effects and negligible non-target risks.

## Introduction

*Spodoptera exigua* (Hübner) (Lepidoptera: Noctuidae) is a notorious insect pest that causes devastating damage to various vegetables and field crops, such as tomatoes, cowpeas, corn, eggplant, peppers, watermelon, and soybeans [1]. Insecticides have been the conventional methods used for the control of this species; however, in addition to its evolved resistance to traditional insecticides (organophosphates, carbamates, and pyrethroids) [2], emerging resistance of *S. exigua* to multiple novel pesticides (e.g., spinosad, abamectin, indoxacarb, and tebufenozide) is also documented [3], thus resulting in failed control efforts. Additionally, the overuse and indiscriminate application of these insecticides chemicals may pose a severe threat to a variety of beneficial organisms, including natural enemies, parasites, soil

fundamentals had no role in study design, data collection and analysis, decision to publish, or preparation of the manuscript.

**Competing interests:** The authors have declared that no competing interests exist.

microbes, earthworms, etc. [4, 5]. Sublethal effects refer to physiological and/or behavioral changes in the surviving individuals following exposure to an insecticide at sublethal doses [6, 7]. In terms of pest management, therefore, insecticides should be selectively employed, taking their physicochemical properties, mode of action and toxicity against non-target species into account [8].

Diamides are a novel class of insecticides used in vegetable production for the control of lepidopteran pests. These insecticides bind to the ryanodine receptor (RyR) and activate the calcium channel, causing an excessive release of intracellular calcium ions, muscle contraction failure and eventual insect death [9]. They are categorized into Group 28 by the Insecticide Resistance Action Committee [10]. A growing body of evidence has revealed the sublethal effects of diamide insecticides on the development and reproduction of *Spodoptera litura* [11], *Helicoverpa assulta* [12], *Agrotis ipsilon* [13], *S. exigua* [14], and *Plutella xylostella* [15]. Although tetrachlorantraniliprole (TCAP) has high insecticidal activity against *S. exigua* [16, 17], little information is available regarding the sublethal effects of TCAP, and its potential toxicological effects on non-target organisms are also poorly understood.

The objectives of this study were to (i) investigate the sublethal effects of TCAP on the life table parameters of *S. exigua* and (ii) assess the acute toxicity of TCAP to *Harmonia axyridis* (Coleoptera: Coccinellidae) and *Eisenia fetida* (Annelida: Lumbricidae).

## Materials and methods

### Ethics statement

This experiment did not involve any endangered or protected species. The earthworms were purchased from the College of Animal Sciences, Zhejiang University, China.

### Biological materials

The *S. exigua* larvae used in this study were collected in August 2016 from *Allium fistulosum* L. at Wusi Farm, Fengxian district Shanghai, China. The first (1<sup>st</sup>) instar larvae were transferred into 24-well plates and fed an artificial diet [18]. Pupae of *S. exigua* were placed in a 200-mL plastic cup until eclosion. The emerged adults were transferred into 100-mesh cages (20 cm in length, 20 cm in width, and 20 cm in height), with 50 female and 50 male adults per cage and were fed a honey-based solution (10%). Subsequently, the eggs were collected on A4 paper. The conditions throughout the *S. exigua* rearing procedures were  $27 \pm 1^\circ\text{C}$  and  $60 \pm 5\%$  relative humidity (RH) with a photoperiod of 14:10 h (L:D).

We used *Aphis glycines* (Matsumura) purchased from Beijing Kuoye Tianyuan Biotechnology Co., Ltd, China, to rear *H. axyridis* (Pallas). The colony of *A. glycines* was collected from a soybean field in May 2014 and was maintained on fava beans (*Vicia faba* L.), while *H. axyridis* adults were reared in 100-mesh cages (20 cm length, 20 cm width, 20 cm height) containing plants infested with *A. glycines*. All the tested insects were maintained under the following conditions:  $25 \pm 1^\circ\text{C}$ ,  $70 \pm 5\%$  RH and a 16:8 h (L:D) photoperiod.

Healthy adult worms of *E. fetida* (Savigny) (weighing 360–410 mg) with well-developed clitella, an obvious girdle and uniform size was purchased from the College of Animal Sciences, Zhejiang University, China, and maintained in artificial soil at  $20 \pm 1^\circ\text{C}$  under dark conditions in a climate chamber. The artificial soil consisted of 10% ground sphagnum peat (<0.5 mm), 20% kaolinite clay (>50% kaolinite), and 70% fine sand [19, 20]. A small amount of calcium carbonate was added to adjust the pH to  $6.0 \pm 0.5$ . Distilled water was replenished on a weekly basis to maintain the maximum water-holding capacity of the soil at approximately 35%.

## Insecticides

Formulated insecticides were used in all bioassays. The TCAP used at 100 g L<sup>-1</sup> SC (9080™ 100 SC) in this study was provided by Shenyang Kechuang Chemical Co., Ltd., Shenyang, China. The lambda-cyhalothrin used at 250 g L<sup>-1</sup> EW (Kung Fu® 25 EW) in this study was obtained from [Syngenta Nantong Crop Protection Co., Ltd.](#), Nantong, China.

## Target toxicity to *S. exigua*

The toxicity of TCAP to the first (1<sup>st</sup>) and third (3<sup>rd</sup>) instar larvae of *S. exigua* was assessed by IRAC method no. 20 [21], viz., through oral delivery. Five-to-nine concentrations of TCAP were prepared as serial dilutions with distilled water. A quantity of 100 mL of each concentration of diluted TCAP was mixed thoroughly with 25 g of artificial diet in a 500-mL plastic box. The artificial diet mixed with distilled water was used for the control group. Each group contained 24-well plates (3 mL per well with 2 mL of artificial diet), and one 1<sup>st</sup> instar (newly hatched larvae < 12 h) was deposited into each well. All the groups were maintained in an incubator at 27 ± 1°C and 60 ± 5% relative humidity (RH) with a photoperiod of 14:10 h (L:D). The mortality was recorded after incubation for 72 h. Larvae that did not respond to a brush touch were considered dead [22].

## Sublethal effects on biological and population parameters

In this experiment, life table theory was used to evaluate the sublethal effects of TCAP on *S. exigua*. An age-stage, two-sex life table was established to assess the population growth [23]. First, approximately 400 eggs laid on the same day were collected and cultured. When most of the eggs had developed into 1<sup>st</sup> instar larvae, 300 larvae were selected for the life table study. Based on the prior acute toxicity test, newly molted 1<sup>st</sup> instar larvae were treated with sublethal concentrations of TCAP (LC<sub>10</sub>, 0.578 µg a.i. L<sup>-1</sup>; LC<sub>30</sub>, 3.182 µg a.i. L<sup>-1</sup>) or distilled water (control). More specifically, one 1<sup>st</sup> instar larva and approximately 2 mL of artificial diet containing LC<sub>10</sub>, LC<sub>30</sub> or distilled water were placed in each well of the 24-well plates, with 100 1<sup>st</sup> instar larvae per group. The developmental times and mortalities of all individuals were recorded until they reached the pupal stage. The weight of the pupae was measured at 24 h after pupation. The identification of pupal sex followed the instructions of Liu et al. [24].

Pupae of *S. exigua* were placed in plastic cups (7.3 and 5.2 cm top and bottom diameters, respectively, and 8.5 cm in height), and each plastic cup contained only one pupa. Pupae that failed to emerge as adults after 15 days were considered dead [12]. After hatching, an adult female and two adult males were paired in a plastic cup covered by a piece of black cloth for mating and oviposition. In addition, a folded piece of white paper of 7.0 cm in length was placed in the plastic cup to collect the eggs and replaced daily. Honey-based solution (10%) was provided as food to the couples every day until the female insect died. The eggs on the paper were counted daily, and the life spans of the pupae and adults were recorded. During the experiment, the dead individuals were removed and not replenished. All *S. exigua* individuals in different developmental stages were incubated under the same conditions described above.

## Non-target toxicity to *H. axyridis*

Using the method described by He et al. [25], 3<sup>rd</sup> instar larvae and adults (2 days old) of the ladybug *H. axyridis* were exposed to insecticides in this assay. The TCAP concentration was applied according to a geometric series (2, 1, 0.5 and 0.25 mL L<sup>-1</sup>). The insecticide lambda-cyhalothrin (12.5 mg L<sup>-1</sup>) was applied at the recommended rate against lepidoptera, i.e., 0.05% (v/v), which was equivalent to 0.00125% (12.5 mg L<sup>-1</sup>) (w/v) of lambda-cyhalothrin, as the active substance.

To evaluate the acute toxicity of TCAP toward *H. axyridis* larvae and adults, petri dishes (9 cm in diameter) lined with 9-cm filter paper were prepared, and then a 1 mL solution of insecticide was applied to the center of the filter paper disks using an eppendorf pipette (Eppendorf, Hamburg, Germany), with distilled water as the control. The filter paper disks were allowed to dry for 30 min at room temperature before 3<sup>rd</sup> instar larvae or adults were transferred to the petri dishes. The individuals of *H. axyridis* were moved to petri dishes and fed *A. glycines*. Ten insects were tested per replicate and four replicates (N = 4) were used per tested concentration. The insects were maintained at 25 ± 1°C, 70 ± 5% RH, and a 16:8 h (L:D). The mortality was recorded after 48 h.

### Non-target toxicity to *E. fetida*

The standard OECD [19] method was followed to test the toxicity of TCAP to *E. fetida* earthworms. In these assays, artificial soil was characterized by the same composition and pH as that described for *E. fetida* rearing; the soil was spiked with TCAP at concentrations of 1000, 500 and 250 mg kg<sup>-1</sup>. We used lambda-cyhalothrin at 32, 16 and 8 mg kg<sup>-1</sup> of dry soil as the positive control, while distilled water was used as the negative control. The serial concentrations of TCAP and lambda-cyhalothrin were mixed into the soil (650 g). Ten earthworms were placed in a black plastic box (surface diameter, 18 cm; bottom diameter, 14 cm; height, 7 cm) filled with the test substrate (650 g). The cover of the black plastic box, which was punctured with small holes for ventilation, was used to prevent the earthworms from escaping. Mortality was assessed at 7 and 14 days post treatment. Ten individuals (n = 10) per replicate and four replicates (N = 4) per concentration were used for each experiment. The black plastic box was incubated in an artificial climate of 20 ± 1°C with a light: dark ratio of 16:8 h, an illumination of 600 lx and a humidity of 80–85%.

### Statistical analysis

Based on the results of the acute toxicity experiment, PoloPlus software [26] was used to calculate the sublethal concentration values (LC<sub>10</sub>, LC<sub>30</sub>, and LC<sub>50</sub>) and their 95% confidence intervals (CIs) for the 1<sup>st</sup> instar larvae of *S. exigua*. Mortality was corrected using the Abbott formula. Abbott's formula is as follows: corrected % mortality = 100 x (1 - (nT/nCo)), where nT = the survivors in the treated diet and nCo = the survivors in the control [27]. The age-stage, two-sex life table parameters such as the age-stage specific survival rate ( $S_{xj}$ ), age-stage specific reproductive values ( $V_{xj}$ ), age-specific survival rate ( $l_x$ ), age-specific reproduction ( $m_x$ ), adult preoviposition period (APOP), total preoviposition period (TPOP), intrinsic growth rate ( $\gamma$ ), finite growth rate ( $\lambda$ ), net reproductive rate ( $R_0$ ), and average generation time ( $T$ ) were generated and analysed by TWSEX-MSChart software wherein the means and standard errors of the parameters were evaluated by a bootstrapping technique with 10,000 repetitions [28, 29]. The life history characteristics and population parameters of *S. exigua* are shown as the mean ± standard error (SE) and were further analyzed by LSD tests with SPSS 17.00 software [30]. Differences were considered significant at  $P < 0.05$ . The mortality of the treated groups was corrected using Abbott's formula normalized to that of the control. The mortality rates (%) were transformed using arcsine  $\sqrt{\quad}$  following ANOVA and Fisher protected least significant ( $P \leq 0.05$ ).

## Results

### Toxic effects of TCAP on the larvae of *S. exigua*

The toxicity of TCAP on the 1<sup>st</sup> and 3<sup>rd</sup> instar larvae of *S. exigua* is shown in Fig 1A. After treatment with different concentrations of TCAP for 72 h, the LC<sub>10</sub>, LC<sub>30</sub>, and LC<sub>50</sub>, for the 1<sup>st</sup>

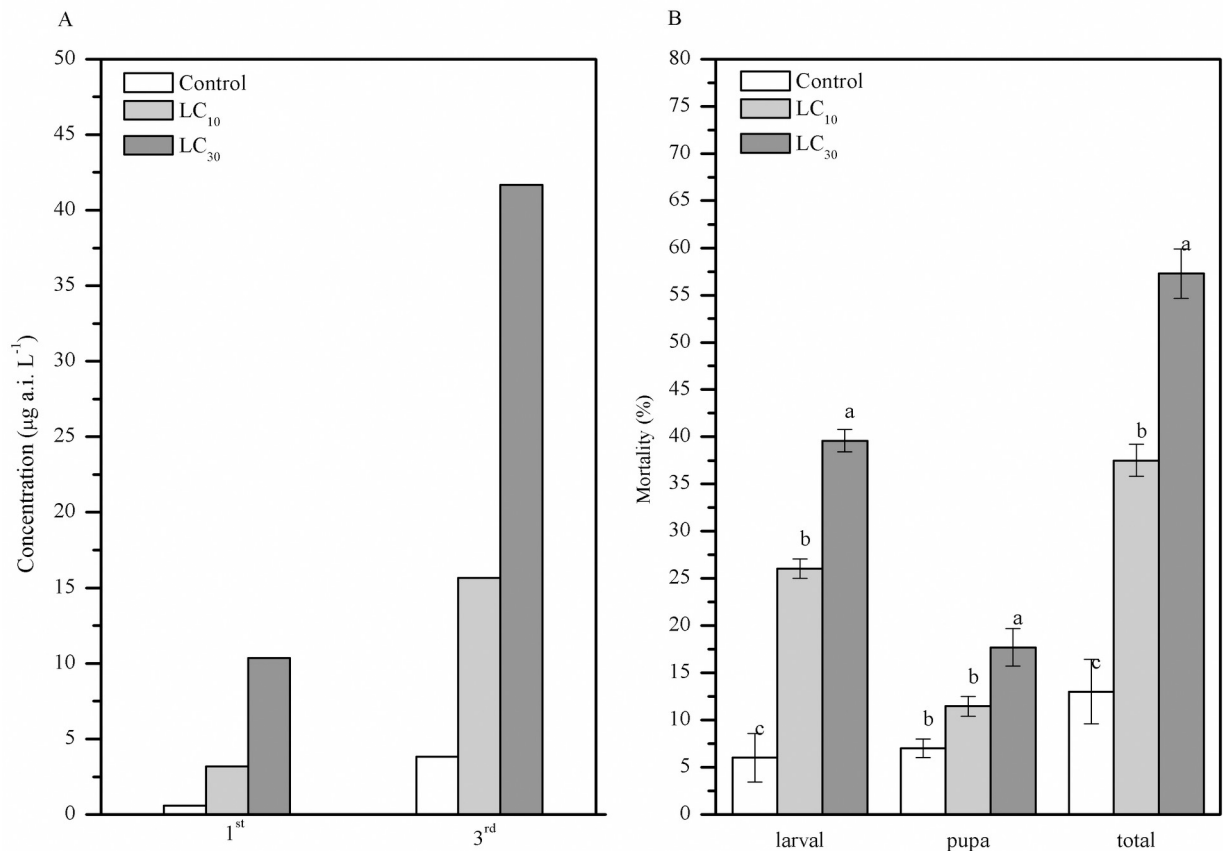

**Fig 1. Toxicity of TCAP to *S. exigua*.** A, LC<sub>10</sub>, LC<sub>30</sub>, and LC<sub>50</sub> of the 1<sup>st</sup> and 3<sup>rd</sup> instar larvae of *S. exigua*; and B, The larval and pupal mortalities of *S. exigua* treated with TCAP. The bars labeled with different letters are significantly different (via Fisher's protected least significant difference (LSD),  $P < 0.05$ ).

<https://doi.org/10.1371/journal.pone.0242052.g001>

instar larvae were 0.578 µg a.i. L<sup>-1</sup> (95% CI 0.159–1.305 µg a.i. L<sup>-1</sup>), 3.182 µg a.i. L<sup>-1</sup> (95% CI 1.438–5.542 µg a.i. L<sup>-1</sup>), and 10.371 µg a.i. L<sup>-1</sup> (95% CI 6.021–16.587 µg a.i. L<sup>-1</sup>) (Chi-squared ( $\chi^2$ ) = 2.805, df = 9,  $P > 0.05$ ), respectively. In contrast, the LC<sub>10</sub>, LC<sub>30</sub>, and LC<sub>50</sub> for the 3<sup>rd</sup> instar larvae were 3.804 µg a.i. L<sup>-1</sup> (95% CI 1.404–7.180 µg a.i. L<sup>-1</sup>), 15.648 µg a.i. L<sup>-1</sup> (95% CI 8.601–23.770 µg a.i. L<sup>-1</sup>), and 41.672 µg a.i. L<sup>-1</sup> (95% CI 28.049–58.604 µg a.i. L<sup>-1</sup>) (Chi-squared ( $\chi^2$ ) = 4.882, df = 6,  $P > 0.05$ ), respectively. Compared with 3<sup>rd</sup> instar larvae, 1<sup>st</sup> instar larvae were more sensitive to TCAP toxicity. The mortality rate of the control group was less than 10%.

### Larval and pupal mortality

The larval and pupal mortalities of *S. exigua* treated with different concentrations of TCAP are shown in Fig 1B. The lowest concentration of TCAP (LC<sub>10</sub>) significantly inhibited larval survival, and the larval mortality increased with the TCAP concentration in a dose-dependent manner ( $F_{2,9} = 93.107$ ,  $P < 0.0001$ ). The pupal mortality was lower than that of the larvae, indicating that the pupae were less susceptible to TCAP toxicity. The total mortality of the LC<sub>10</sub> and LC<sub>30</sub> reached 37.5±1.70% and 57.29±2.62% ( $F_{2,9} = 68.91$ ,  $P < 0.0001$ ), respectively.

### Effects of TCAP on the development and reproduction of *S. exigua*

The development, pupal weight, longevity, and fecundity of *S. exigua* in different treatment groups are shown in Table 1. Compared with those of the control group, the durations of the

Table 1. Effects of TCAP on the development, pupal weight, longevity, and fecundity of *S. exigua*.

|                              |                 | Control       | LC <sub>10</sub> | LC <sub>30</sub> | F(df), p                      |
|------------------------------|-----------------|---------------|------------------|------------------|-------------------------------|
| Larval duration (days)       | 1 <sup>st</sup> | 1.97±0.02c    | 2.92±0.03b       | 3.01±0.04a       | F(2,289) = 381.764, P = 0.000 |
|                              | 2 <sup>nd</sup> | 2.05±0.03b    | 2.42±0.05a       | 2.41±0.06a       | F(2,266) = 20.543, P = 0.000  |
|                              | 3 <sup>rd</sup> | 2.30±0.06ab   | 2.18±0.05b       | 2.38±0.07a       | F(2,234) = 2.469, P = 0.087   |
|                              | 4 <sup>th</sup> | 2.49±0.06b    | 2.11±0.04c       | 2.71±0.11a       | F(2,216) = 14.547, P = 0.000  |
|                              | 5 <sup>th</sup> | 4.93±0.08a    | 4.25±0.06b       | 4.46±0.09b       | F(2,200) = 22.702, P = 0.000  |
| Total larval duration (days) |                 | 13.68±0.11b   | 13.85±0.10b      | 14.77±0.22a      | F(2,200) = 15.239, P = 0.000  |
| Pupal stage (days)           |                 | 6.74±0.05b    | 7.18±0.08a       | 7.29±0.09a       | F(2,184) = 21.533, P = 0.000  |
| Pupal weight (g)             |                 | 95.64±0.99a   | 87.91±1.02b      | 84.22±1.77c      | F(2,184) = 24.812, P = 0.000  |
| APOP (days)                  |                 | 2.09±0.09a    | 2.13±0.10a       | 2.11±0.29a       | F(2,88) = 0.025, P = 0.9750   |
| TPOP (days)                  |                 | 25.60±0.21b   | 26.20±0.23b      | 27.33±0.49a      | F(2,88) = 8.674, P = 0.000    |
| Longevity of adults (days)   | Female          | 6.26±0.20a    | 6.01±0.24a       | 6.39±0.37a       | F(2,88) = 0.529, P = 0.591    |
|                              | Male            | 5.96±0.16a    | 6.11±0.26a       | 5.87±0.33a       | F(2,93) = 0.223, P = 0.800    |
| Fecundity (one female adult) |                 | 628.56±15.29a | 416.23±18.54b    | 400.50±21.46b    | F(2,88) = 55.261, P = 0.000   |

Within a column, the means followed by different letters represent significant differences between the three groups based on the paired bootstrap test ( $P < 0.05$ ). APOP: adult preoviposition period; TPOP: total preoviposition period.

<https://doi.org/10.1371/journal.pone.0242052.t001>

1<sup>st</sup> and 2<sup>nd</sup> instar larval and pupal stages were significantly prolonged in the LC<sub>10</sub> group, while the durations of the 3<sup>rd</sup>, 4<sup>th</sup>, and 5<sup>th</sup> instar larval stages were shortened. In the LC<sub>30</sub> group, the entire larval stage, pupal stage, and TPOP were significantly longer than those of the control. TCAP significantly reduced the pupal weight, and this became more pronounced when *S. exigua* was exposed to a higher pesticide concentration (LC<sub>30</sub>). The fecundity markedly declined upon TCAP exposure relative to that under the control condition, but there was no significant difference between the LC<sub>10</sub> and LC<sub>30</sub> groups. In addition, the longevity of the female and male adults was slightly affected by TCAP; however, there was no significant difference between the three groups.

### Effects of sublethal TCAP on the life table parameters of *S. exigua*

The life table parameters of *S. exigua* were substantially affected by the sublethal concentrations of TCAP. As shown in Table 2, the  $\gamma$ ,  $R_0$ , and  $\lambda$  values of the LC<sub>10</sub> and LC<sub>30</sub> groups were significantly lower than those of the control. In addition, sublethal levels of TCAP significantly prolonged the generation time in a dose-dependent manner.

The age-stage survival rate ( $S_{xj}$ ) curves (Fig 2) illustrated the survival rates of newly hatched larvae developing to the  $x$  and  $j$  stages. Due to developmental differences between individuals, there were significant overlaps between the two phases in the three treatments. Compared with those in control group, the 2<sup>nd</sup> instar larvae in the LC<sub>10</sub> and LC<sub>30</sub> groups as well as the adults in the LC<sub>10</sub> group developed later. In addition, TCAP negatively affected the  $S_{xj}$  value.

Table 2. Mean ( $\pm$ SE) life-table parameters of *S. exigua* treated with TCAP.

|                  | Intrinsic growth rate ( $\gamma$ ) (d <sup>-1</sup> ) | Net reproductive rate ( $R_0$ ) (offspring) | Finite growth rate ( $\lambda$ ) (d <sup>-1</sup> ) | Average generation time ( $T$ ) (d) |
|------------------|-------------------------------------------------------|---------------------------------------------|-----------------------------------------------------|-------------------------------------|
| Control          | 0.2054±0.005a                                         | 270.76±32.03a                               | 1.23±0.013a                                         | 27.19±0.34c                         |
| LC <sub>10</sub> | 0.1734±0.006b                                         | 125.26±19.80b                               | 1.19±0.008b                                         | 27.79±0.21b                         |
| LC <sub>30</sub> | 0.1485±0.008c                                         | 72.07±15.80c                                | 1.16±0.010c                                         | 28.65±0.39a                         |

Different letters in a column represent significant differences. In total, of 100 larvae were used for each treatment ( $n = 100$ ).

<https://doi.org/10.1371/journal.pone.0242052.t002>

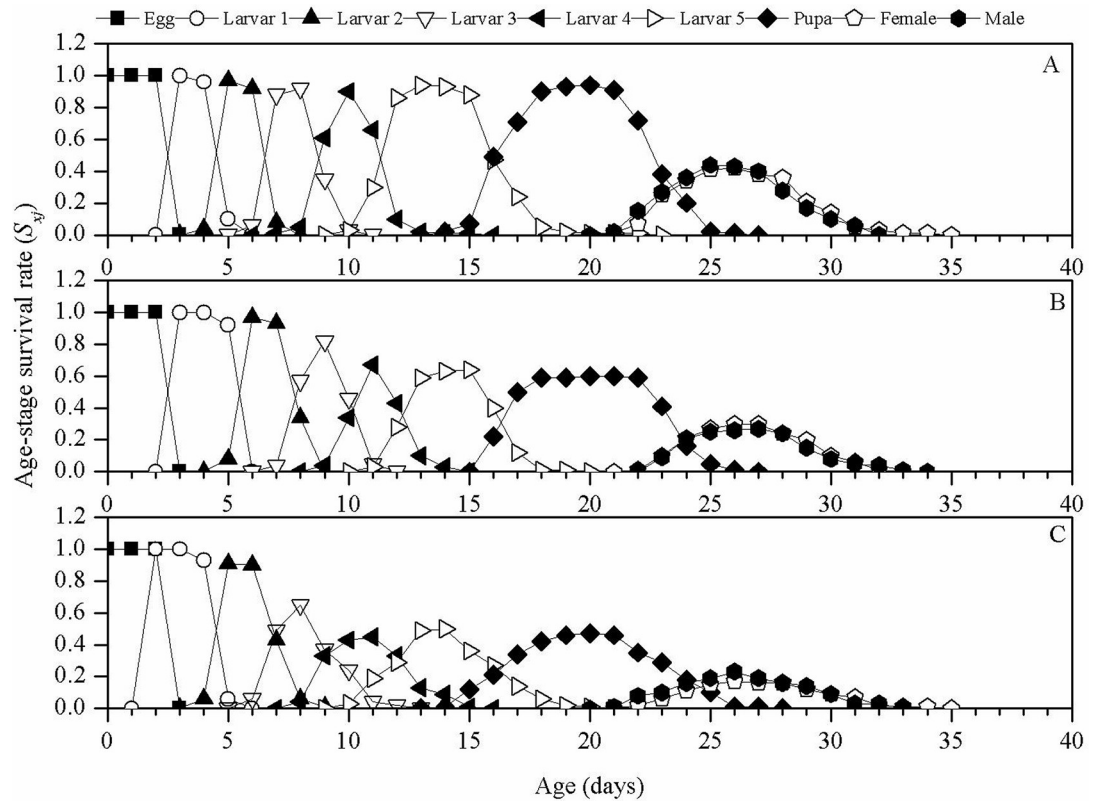

**Fig 2. Age-stage specific survival rate ( $S_{xj}$ ) curves of *S. exigua* treated with sublethal concentrations of TCAP. A, control; B,  $LC_{10}$  group; and C,  $LC_{30}$  group.**

<https://doi.org/10.1371/journal.pone.0242052.g002>

Among the three groups, the  $S_{xj}$  value of the control was the highest (0.42 for the males and 0.41 for the females), while the  $S_{xj}$  values decreased with the increase of the in TCAP concentration ( $LC_{10}$  group: 0.27 for the males and 0.30 for the females;  $LC_{30}$  group: 0.20 for the males and 0.16 for the females).

In addition to the different developmental stages, the age-specific survival rate ( $l_x$ ) curves, which are simplified forms of  $S_{xj}$ , present the survival rates of the newly hatched larvae entering age stage  $x$  (Fig 3A). The  $l_x$  of the individuals treated with TCAP significantly decreased on day 5 compared with that of the control group (Fig 3A). According to the age-specific fecundity ( $m_x$ ) curve of the total population, the starting and ending points of oviposition in the  $LC_{10}$  and  $LC_{30}$  groups were earlier than those in the control group (Fig 3B), while the spawning durations of the individuals in the TCAP treatments were shorter than those under the control conditions. Fig 3C shows the age-specific maternity ( $l_x m_x$ ) curves, which were dependent on  $l_x$  and  $m_x$ . The oviposition behaviour of the control group peaked on the 27<sup>th</sup> day (69.08 eggs per adult female), while the maximum egg production in the  $LC_{10}$  and  $LC_{30}$  groups occurred on the 26<sup>th</sup> and 27<sup>th</sup> days, at 34.35 and 17.69 eggs, respectively.

In the larval stage, changes in age-stage reproductive values ( $V_{xj}$ ) between three groups were similar; however, the  $V_{xj}$  of the 5<sup>th</sup> instar larvae of the  $LC_{30}$  group was higher than that of the  $LC_{10}$  and control groups (Fig 4A, 4C and 4E). For the pupal and adult stages, the peaks of  $V_{xj}$  in the  $LC_{10}$  and  $LC_{30}$  groups appeared on the 25<sup>th</sup> day, with  $V_{xj}$  values of 305 and 306, respectively. The peak in the control group appeared on the 24<sup>th</sup> day ( $V_{xj}$  of 410 each day) and was higher than those in the TCAP treatments groups (Fig 4B, 4D and 4F).

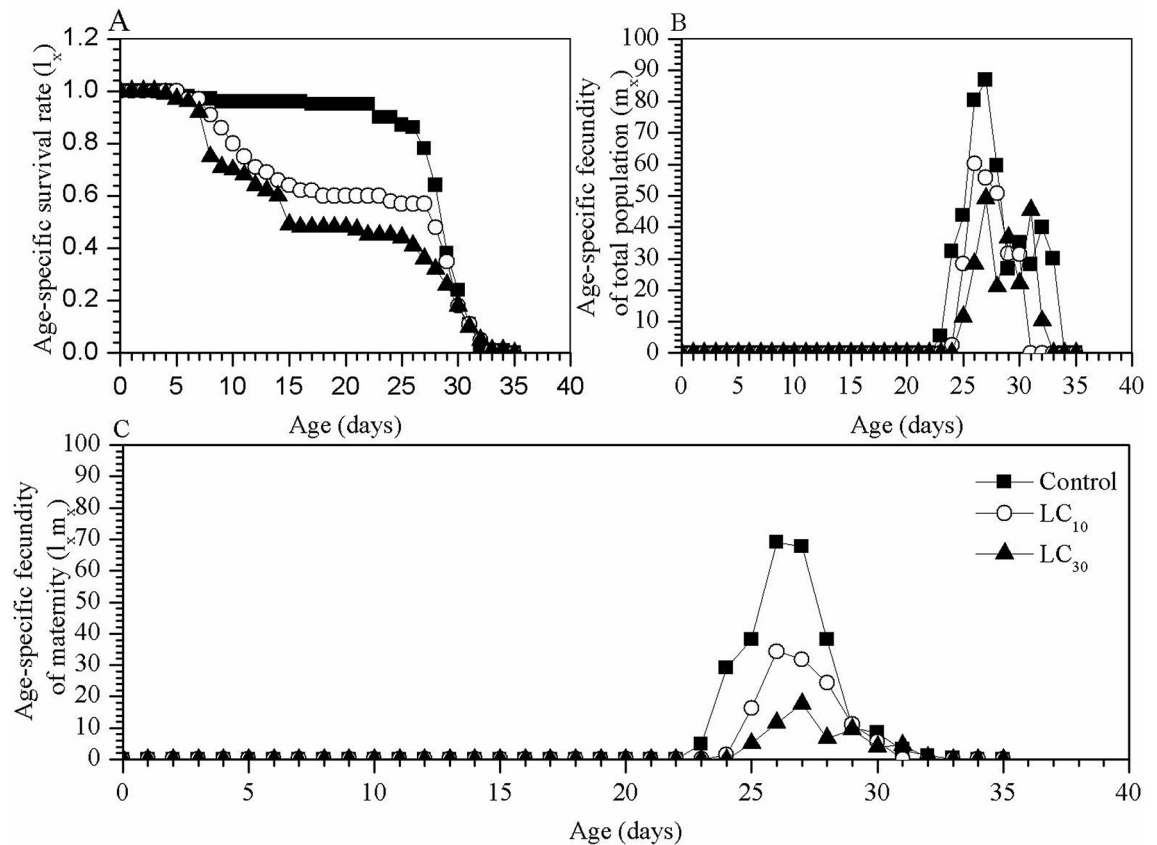

**Fig 3. Effects of sublethal TCAP on the age-specific survival rate and population fecundity.** A, age-specific survival rate curve ( $l_x$ ); B, age-specific curve of the fecundity of the total population ( $m_x$ ); and C, age-specific maternity curve ( $l_x m_x$ ) for *S. exigua*.

<https://doi.org/10.1371/journal.pone.0242052.g003>

### Effects of TCAP on non-target organisms

The mortality of *H. axyridis* was significantly different between the TCAP and lambda-cyhalothrin treatments (Table 3). The results showed that the toxicity of TCAP at 2 mg L<sup>-1</sup> to the larvae of *H. axyridis* was significantly lower than of the toxicity of lambda-cyhalothrin, which was not significantly different from that of the control ( $F_{5, 18} = 143.502$ ;  $P < 0.0001$ ). Regardless of the concentrations, the TCAP treatments did not trigger a significant lethal effect relative to the control ( $F_{5, 18} = 106.153$ ;  $P < 0.0001$ ).

In the artificial soil test, similar to the scenario for *H. axyridis*, TCAP and lambda-cyhalothrin demonstrated significantly different effects on the mortality of earthworms (Table 4). The results showed that the toxicity of TCAP at 1000 mg kg<sup>-1</sup> to *E. fetida* after 7 days and 14 days was significantly lower than that of lambda-cyhalothrin, and there was no significant difference compared with the control levels.

### Discussion

Insecticides are generally unevenly distributed and degrade when applied in the field, which enhances the probability of insect exposure to low concentrations of insecticides. Therefore, studying the sublethal effects of insecticides on target insects could improve the rational utilization of pesticides [31–33]. As a newly developed diamide insecticide, TCAP is generally used to control lepidopteran pests, such as *P. xylostella* [34]. By reviewing the literature, we found



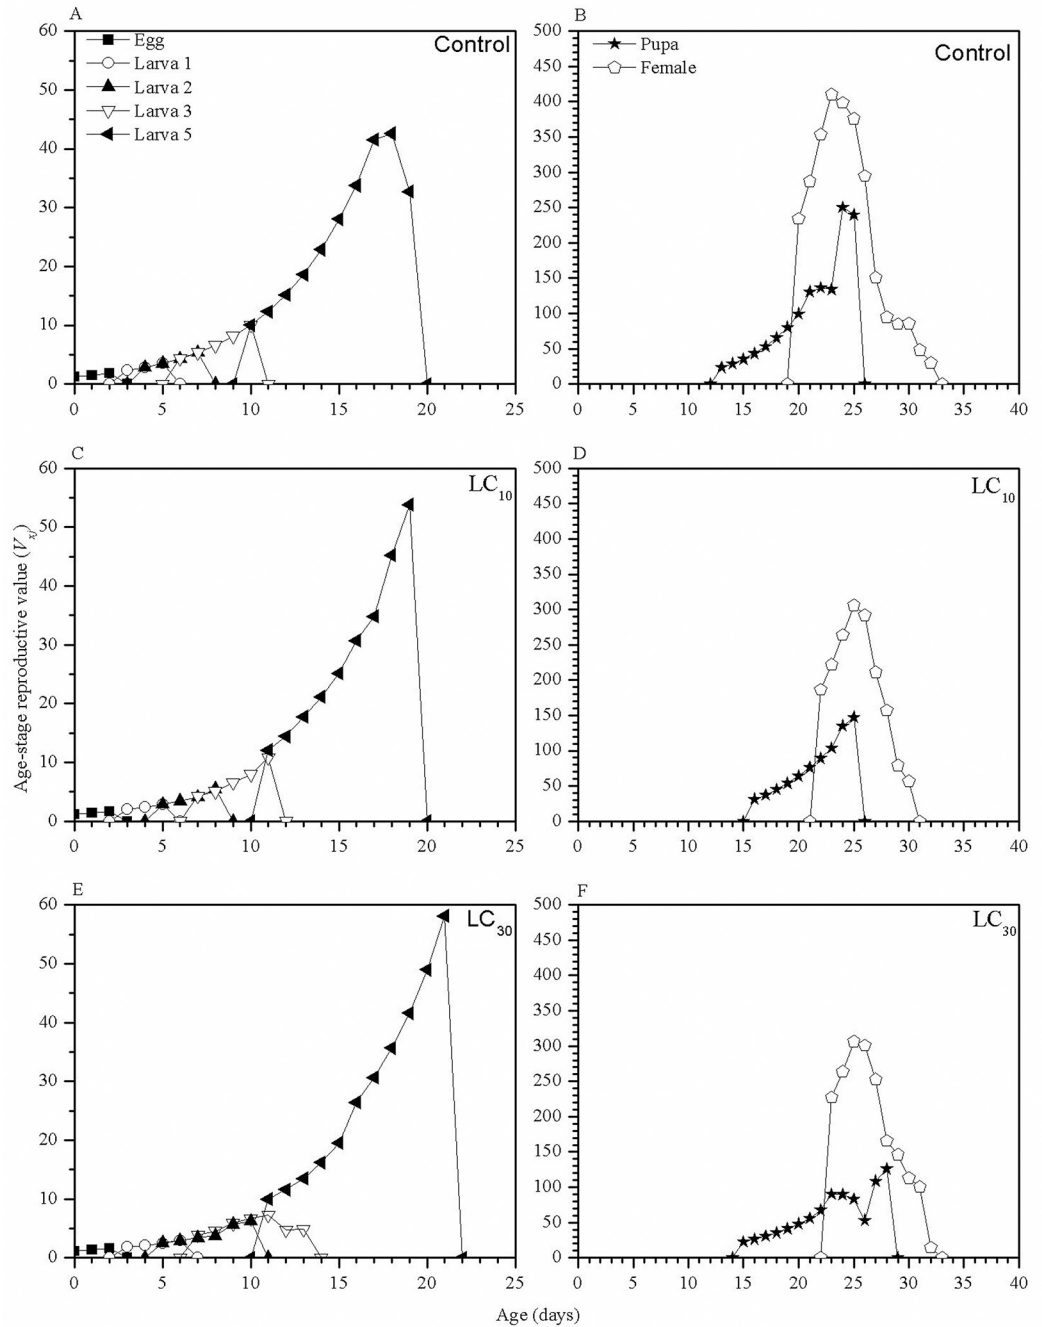

**Fig 4. The age-stage reproduction curves ( $V_{xj}$ ) of *S. exigua*.** A, the  $V_{xj}$  curves of the larvae in the control group; B, the  $V_{xj}$  curves of the pupae and adult females in the control group; C, the  $V_{xj}$  curves of the larvae in the  $LC_{10}$  group; D, the  $V_{xj}$  curves of the pupae and adult females in the  $LC_{10}$  group; E, the  $V_{xj}$  of the larvae in the  $LC_{30}$  group; and F, the  $V_{xj}$  of the pupae and adult females in the  $LC_{30}$  group.

<https://doi.org/10.1371/journal.pone.0242052.g004>

that *S. exigua* larvae were more sensitive to TCAP ( $LC_{50}$ ,  $10.371 \mu\text{g L}^{-1}$ ) than to other insecticides, such as chlorantraniliprole ( $LC_{50}$ ,  $35 \mu\text{g L}^{-1}$ ), cyanamide ( $LC_{50}$ ,  $92 \mu\text{g L}^{-1}$ ), chlorpyrifos ( $LC_{50}$ ,  $2401 \mu\text{g L}^{-1}$ ), and emamectin benzoate ( $LC_{50}$ ,  $537 \mu\text{g L}^{-1}$ ), avermectin ( $LC_{50}$ ,  $2687 \mu\text{g L}^{-1}$ ), hexaflumuron ( $LC_{50}$ ,  $7384 \mu\text{g L}^{-1}$ ), and methoxyfenozide ( $LC_{50}$ ,  $2167 \mu\text{g L}^{-1}$ ) [2]. Our results showed that the fecundity and longevity of *S. exigua* larvae and adults were significantly

Table 3. Acute toxicity of TCAP against the larvae and adults of *H. axyridis*.

| Concentration of TCAP (mL L <sup>-1</sup> )   | Mortality of larvae (% ±SE)              | Mortality of adults (% ±SE)              |
|-----------------------------------------------|------------------------------------------|------------------------------------------|
| 2 mL L <sup>-1</sup>                          | 52.5±4.2b                                | 0.0±0.0b                                 |
| 1 mL L <sup>-1</sup>                          | 35.0±2.5bc                               | 0.0±0.0b                                 |
| 0.5 mL L <sup>-1</sup>                        | 20.0±3.6c                                | 0.0±0.0b                                 |
| 0.25 mL L <sup>-1</sup>                       | 7.5±2.2d                                 | 0.0±0.0b                                 |
| Lambda-cyhalothrin (12.5 mL L <sup>-1</sup> ) | 100.0±0.0a                               | 27.5±4.2a                                |
| Control                                       | 0.0±0.0e                                 | 0.0±0.0b                                 |
| ANOVA                                         | F = 143.502;<br>df = 5,18;<br>P < 0.0001 | F = 106.153;<br>df = 5,18;<br>P < 0.0001 |

Different letters in a column represent significant differences.

<https://doi.org/10.1371/journal.pone.0242052.t003>

decreased in the LC<sub>10</sub> and LC<sub>30</sub> TCAP groups, which was consistent with the finding of Lai and Su that sublethal concentrations of chlorantraniliprole suppressed *S. exigua* fecundity [35], indicating that TCAP is an effective alternative tool for *S. exigua* management.

Studies have shown that sublethal concentrations of some insecticides induce fecundity-stimulating effects and result in a resurgence of the insect pest population. For example, sublethal doses of imidacloprid and azadirachtin stimulated the reproduction of green peach aphids, and sublethal doses of triazofos and pyrethroids contributed to the enhanced fecundity of brown planthoppers [36, 37]. In contrast, this study revealed that the fecundity of *S. exigua* treated with sublethal concentrations of TCAP was significantly reduced compared to the control level. It seems that the LC<sub>10</sub> of TCAP disrupted the energy homeostasis and prolonged the larval stage of *S. exigua*, contributing to larvae shifting energy from growth to detoxification metabolism [38]. Likewise, the LC<sub>30</sub> of TCAP retarded the growth of *S. exigua* with a prolonged TPOP. These results illustrated that a sublethal concentration of TCAP did not induce resurgence in the *S. exigua* population.

The age-stage, two-sex life table theory can be used to evaluate the effect of insecticides on insect populations. The life table parameters can be used to assess the sublethal effects of insecticides at the population level [39, 40]. The population parameters, such as  $\gamma$ ,  $\lambda$ , and  $R_0$ , substantially declined in the LC<sub>10</sub> and LC<sub>30</sub> groups compared with those in the control group, suggesting that sublethal TCAP concentrations inhibited the growth rate and reproduction of

Table 4. Toxicity of TCAP against *E. fetida* earthworms.

| Treatment and concentration (mg kg <sup>-1</sup> ) | 7th day (mortality% ±SE)                | 14th day (mortality% ±SE)               |
|----------------------------------------------------|-----------------------------------------|-----------------------------------------|
| TCAP-1000 mg kg <sup>-1</sup>                      | 2.5±2.2c                                | 5.0±2.5b                                |
| TCAP-500 mg kg <sup>-1</sup>                       | 0.0±0.0c                                | 0.0±0.0b                                |
| TCAP-250 mg kg <sup>-1</sup>                       | 0.0±0.0c                                | 0.0±0.0b                                |
| Lambda-cyhalothrin-32 mg kg <sup>-1</sup>          | 100.0±0.0a                              | 100.0±0.0a                              |
| Lambda-cyhalothrin-16 mg kg <sup>-1</sup>          | 95.0±2.5ab                              | 100.0±0.0a                              |
| Lambda-cyhalothrin-8 mg kg <sup>-1</sup>           | 87.5±2.2b                               | 97.5±2.2a                               |
| Control                                            | 0.0±0.0c                                | 0.0±0.0b                                |
| ANOVA                                              | F = 237.033;<br>df = 6,21<br>P < 0.0001 | F = 301.306;<br>df = 6,21<br>P < 0.0001 |

Different letters in a column represent significant differences.

<https://doi.org/10.1371/journal.pone.0242052.t004>

*S. exigua*, which was in agreement with the report from Lanka et al. [41]. According to the  $S_{xj}$  and  $l_x$  curves, sublethal TCAP levels reduced the survival rate of the *S. exigua* population. Furthermore, TCAP inhibited reproductive efficiency, as concluded from the  $V_{xj}$  and  $m_x$  curves. These results strongly indicated a reduction in the number of *S. exigua* population. Other studies have also shown that the sublethal effects of multiple insecticides adversely affected the life table parameters of pests and reduced the number of  $F_1$  offspring [23, 42].

For pesticide application in agrosystems, it is of parallel importance to both determine the insecticide efficacy against the target organisms and assess its hazards to nontarget organisms. In this study, the effect of TCAP on the mortality of *H. axyridis*, which is a natural enemy of *S. exigua*, was determined. TCAP did not show any toxicity toward the adults of *H. axyridis* (Table 3). Similarly, chlorantraniliprole has been proven to be safe for *Orius laevigatus*, and sunflower EFN contaminated with chlorantraniliprole caused no lethal effects when consumed by *Lysiphlebus testaceipes* adults [43, 44]. We also found that when exposed to TCAP, the mortality of larvae of *H. axyridis* increased with the TCAP concentrations and exhibited a dose-response relationship (Table 3). This result is partially attributed to the stronger xenobiotic tolerance and defense capacity of adults than of larvae. Nevertheless, for the larvae of *H. axyridis* exposed to 0.25 mL L<sup>-1</sup>–0.5 mL L<sup>-1</sup> TCAP, the average mortality was below 20%, which was in line with the finding that chlorantraniliprole was less toxic to *Podisus nigrispinus* and *Suppuitius cincticeps* nymphs, resulting in mortality rates for both species of less than 10% when exposed to 10x the recommended field rates of chlorantraniliprole for 72 h [45]. Additionally, chlorantraniliprole caused less than 25% mortality in *Macrolophus pygmaeus* and was classified as harmless according to the International Organization for Biological Control rating scheme [46], its environmental stress on natural enemies could not be disregarded. For example, the chlorantraniliprole applied at recommended field rates for the control of *Chloridea virescens* caused high mortality in adult predator *Hippodamia convergens* [47].

Pesticides are directly applied to soil for controlling soil borne pests or deposited in soil as runoff from foliar applications [48]. The concentrations applied to control pests are high enough to affect non target organisms and constitute potential hazards to the structure and functioning of terrestrial ecosystems [49]. Earthworms as “ecological engineers” play pivotal roles in maintaining soil physicochemical structure, facilitating aeration, energy flow, nutrient cycling as well as enhancing soil fertility [50]. Due to their close contact and high sensitivity to toxicants, they have been identified as bio-indicators for early warning of soil pollution [51]. Earlier reports have revealed that pesticides may exert detrimental effects on earthworm at all organisation levels from sub-individual level to community level [52, 53] and the chemicals should be subjected to environmental risk assessment before registration or commercial use. Consequently, we employed the standardised test species *E. fetida* to evaluate the non-target and ecological toxicity of TCAP.

The toxicity of pesticides to earthworms depends on a variety of factors, such as the physicochemical properties of soil, exposure concentration and duration, and degradation dynamics in soil etc [50, 54, 55]. Vasantha-Srinivasan et al. [5] compared the toxicity of temefos and monocrotofos to *E. fetida* and estimated that the LC<sub>50</sub> values of temefos and monocrotofos were 3.8 and 5.3 mg kg<sup>-1</sup>, respectively. Wang et al. [55] reported that clothianidin was the most toxic to the earthworm *E. fetida* among nine pesticides, with LC<sub>50</sub> values of 7.44 mg kg<sup>-1</sup> and 6.06 mg kg<sup>-1</sup> at day 7 and day 14, respectively. According to Mali [56], the suggested standard of toxicity is LC<sub>50</sub> < 1 mg kg<sup>-1</sup> for highly toxic pesticides, 1–10 mg kg<sup>-1</sup> for moderately toxic pesticides, and > 10 mg kg<sup>-1</sup> for mildly toxic pesticides. Hence, the toxicities of temefos, monocrotofos and clothianidin were designated moderate. However, the other 8 pesticides were considered mildly toxic, with LC<sub>50</sub> values well beyond 100 mg kg<sup>-1</sup> [55]. Likewise, Wang et al. [54] examined the toxic effects of 24 insecticides from distinct classes on *E. fetida*. Among

them, the four pyrethroid insecticides tested were the least toxic, with  $LC_{50}$  values higher than  $1000 \text{ mg kg}^{-1}$ . Herein, the toxicity of TCAP to *E. fetida* was tested, and even a concentration of  $1000 \text{ mg kg}^{-1}$  did not induce significant death in the earthworms. Therefore, this pesticide may have low toxicity to terrestrial ecosystems and living organisms.

## Conclusions

In conclusion, TCAP displayed a lower toxicity to *S. exigua* than other insecticides. Sublethal concentrations of TCAP ( $LC_{10}$  and  $LC_{30}$ ) increased the larval and pupal durations, prolonged the average generation time and reduced the survival rate, longevity, and fecundity of *S. exigua*. Notably, no population resurgence occurred. TCAP was non-toxic to *H. axyridis* ladybugs and *E. fetida*, suggesting that it could be environmentally friendly for natural enemies and soil invertebrates, which is of great importance for ecotoxicological and environmental fate studies focusing on TCAP. Overall, the present study provides a reference for the proper and safe utilization of TCAP to suppress *S. exigua* populations in the field.

Further research should include ecotoxicological risk assessments, the interaction between insecticides and natural enemies and the sublethal side effects of insecticides on other predators.

## Author Contributions

**Conceptualization:** Haiyuan Teng, Dongsheng Wang.

**Data curation:** Haiyuan Teng, Yongda Yuan.

**Formal analysis:** Haiyuan Teng, Yongda Yuan, Dongsheng Wang.

**Funding acquisition:** Haiyuan Teng, Yongda Yuan, Dongsheng Wang.

**Investigation:** Haiyuan Teng, Yongda Yuan, Tianshu Zhang, Xiaoli Chang.

**Methodology:** Haiyuan Teng, Yongda Yuan.

**Project administration:** Yongda Yuan, Dongsheng Wang.

**Resources:** Haiyuan Teng.

**Software:** Haiyuan Teng, Tianshu Zhang.

**Supervision:** Haiyuan Teng.

**Validation:** Haiyuan Teng.

**Visualization:** Haiyuan Teng.

**Writing – original draft:** Haiyuan Teng, Yongda Yuan, Tianshu Zhang.

**Writing – review & editing:** Haiyuan Teng, Yongda Yuan, Dongsheng Wang.

## References

1. Metcalf RL, Metcalf RA. In: Destructive and useful insects: their habits and control, fifth ed. McGraw-Hill, San Francisco, USA, 1992; 490.
2. Wang X, Xiang X, Yu H, Liu S, Yin Y, Cui P, et al. Monitoring and biochemical characterization of beta-cypermethrin resistance in *Spodoptera exigua* (Lepidoptera: Noctuidae) in Sichuan Province, China. *Pestic Biochem Physiol.* 2018; 146: 71–79. <https://doi.org/10.1016/j.pestbp.2018.02.008> PMID: 29626995
3. Ahmad M, Farid A, Saeed M. Resistance to new insecticides and their synergism in *Spodoptera exigua* (Lepidoptera: Noctuidae) from Pakistan. *Crop Prot.* 2018; 107: 79–86. <https://doi.org/10.1016/j.cropro.2017.12.028>

4. Kinney CA, Campbell BR, Thompson R, Furlong ET, Kolpin DW, Burkhardt MR. Earthworm bioassays and seedling emergence for monitoring toxicity, aging and bioaccumulation of anthropogenic waste indicator compounds in bio solids-amended soil. *Sci Total Environ*. 2012; 433: 507–515. <https://doi.org/10.1016/j.scitotenv.2012.06.097> PMID: 22832088
5. Vasantha-Srinivasan P, Senthil-Nathan S, Ponsankar A, Thanigaivel A, Chellappandian M, Edwin ES, et al. Acute toxicity of chemical pesticides and plant-derived essential oil on the behavior and development of earthworms, *Eudrilus eugeniae* (Kinberg) and *Eisenia fetida* (Savigny). *Environ Sci Pollu Res*. 2018; 25(11): 10371–10382. <https://doi.org/10.1007/s11356-017-9236-6>.
6. Desneux N, Decourtye A, Delpuech JM. The sublethal effects of pesticides on beneficial arthropods. *Annu Rev Entomol*. 2007; 52: 81–106. <https://doi.org/10.1146/annurev.ento.52.110405.091440> PMID: 16842032
7. Guedes RN, Campbell JF, Arthur FH, Opit GP, Zhu KY, Throne JE. Acute lethal and behavioral sublethal responses of two stored-product psocids to surface insecticides. *Pest Manag Sci*. 2008; 64(12):1314–22. <https://doi.org/10.1002/ps.1634> PMID: 18683906
8. Selin-Rani S, Senthil-Nathan S, Revathi K, Chandrasekaran R, Thanigaivel A, Vasantha-Srinivasan P. Toxicity of *Alangium salvifolium* Wang chemical constituents against the tobacco cutworm *Spodoptera litura* Fab. *Pest Biochem Phys*. 2016; 126:92–101. <https://doi.org/10.1016/j.pestbp.2015.08.003> PMID: 26778440
9. Cordova D, Benner EA, Sacher MD, Rauh JJ, Sopa JS, Lahm GP, et al. Anthranilic diamides: a new class of insecticides with a novel mode of action, ryanodine receptor activation. *Pestic Biochem Physiol*. 2006; 84:196–214. <https://doi.org/10.1016/j.pestbp.2005.07.005>
10. <http://www.irac-online.org/>.
11. Sang S, Shu BS, Hu M, Wang Z, Zhong GH. Sublethal effects of cyantraniliprole on the development and reproduction of the cabbage cutworm, *Spodoptera litura*. *J South China Agric Univ (Nat Sci)*. 2014; 35:64–68. <https://doi.org/10.7671/j.issn.1001-411X.2014.05.011> (in Chinese).
12. Dong J, Wang K, Li Y, Wang S. Lethal and sublethal effects of cyantraniliprole on *Helicoverpa assulta* (Lepidoptera: Noctuidae). *Pestic Biochem Physiol*. 2016; 136: 58. <https://doi.org/10.1016/j.pestbp.2016.08.003> PMID: 28187832
13. Chen X, Ma K, Li F, Liang P, Liu Y, Guo T, et al. Sublethal and transgenerational effects of sulfoxaflor on the biological traits of the cotton aphid, *Aphis gossypii* Glover (Hemiptera: Aphididae). *Ecotoxicology*. 2016; 25:1–8. <https://doi.org/10.1007/s10646-015-1560-3> PMID: 26441339
14. Yu HL, Xiang X., Yuan GX, Chen YQ, Wang XG. Effects of sublethal doses of cyantraniliprole on the growth and development and the activities of detoxifying enzymes in *Spodoptera exigua* (Lepidoptera: Noctuidae). *Acta Entomol Sin*. 2015; 58: 634–641 (in Chinese).
15. Han WS, Zhang SF, Shen FY, Liu M, Ren CC, Gao XW. Residual toxicity and sublethal effects of chlorantraniliprole on *Plutella xylostella* (Lepidoptera: plutellidae). *Pest Manag Sci*. 2012; 68: 1184–90. <https://doi.org/10.1002/ps.3282> PMID: 22492544
16. Liu SW, Chang XH, Ban LF, Song YQ, Li B. Research on biological activity of four ryanodine receptor insecticides. *Modern Agrochemicals*. 2017; 16: 47–49 (in Chinese).
17. Zhang M, Xia HS, Sun SJ, Wu PY, Chen YT. Effects of 10% tetrachlorantraniliprole suspension on cauliflower *Spodoptera exigua*. *Anhui Agri Sci Bull*. 2017; 23: 80, 91 (in Chinese).
18. Xiao K, Shen K, Zhong JF, Li GQ. Effects of dietary sodium on performance, flight and compensation strategies in the cotton bollworm, *Helicoverpa armigera* (Hübner) (Lepidoptera: Noctuidae). *Frontiers in Zoology*. 2010; 7(1):1–8. <https://doi.org/10.1186/1742-9994-7-11> PMID: 20385025
19. OECD. Guideline for testing of chemicals no. 207. Earthworm, acute toxicity tests. OECD-guideline for testing chemicals, Paris, France.1984.
20. OECD. OECD guideline for the testing of chemicals: earthworm reproduction test (*Eisenia fetida*/*Eisenia andreii*). 2004; 222.
21. IRAC. Insecticide Resistance Action Committee, Method No: 020. <https://www.irac-online.org/methods/spodoptera-helicoverpa-heliothis-larvae/2011>.
22. Jia BJ, Liu YJ, Zhu YC, Liu XG, Gao CF, Shen JL. Inheritance, fitness cost and mechanism of resistance to tebufenozide in *Spodoptera exigua* (Hübner) (Lepidoptera: Noctuidae). *Pest Manag Sci*. 2010; 65: 996–1002. <https://doi.org/10.1002/ps.1785>.
23. Xu C, Zhang Z, Cui K, Zhao Y, Han J, Liu F, et al. Effects of Sublethal Concentrations of Cyantraniliprole on the Development, Fecundity and Nutritional Physiology of the Black Cutworm *Agrotis ipsilon* (Lepidoptera: Noctuidae). *Plos One*. 2016; 11: e0156555. <https://doi.org/10.1371/journal.pone.0156555> PMID: 27249654
24. Liu YB, Tabashnik BE. Experimental evidence that refuges delay insect adaptation to *Bacillus thuringiensis*. *Proc Biol Sci*. 1997; 264: 605–610.

25. He FL, Sun S, Sun X, Ji SM, Li XD, Zhang JW, et al. Effects of insect growth-regulator insecticides on the immature stages of *Harmonia axyridis* (Coleoptera: Coccinellidae). *Ecotox Environ Safe*. 2018; 164: 665–674. <https://doi.org/10.1016/j.ecoenv.2018.08.076> PMID: 30170315
26. LeOra Software. PoloPlus, a user's guide to probit and logit analysis. LeOra Software, Berkeley, CA. 2003.
27. Abbott WS. A method of computing the effectiveness of an insecticide. *J Econ Entomol*. 1925; 18: 265–267.
28. Chi H, Liu H. Two new methods for the study of insect population ecology. *Bull Inst Zool Acad Sin*. 1985; 24: 225–240.
29. Chi H. TWOSEX-MSChart: a computer program for the age-stage, two-sex life table analysis. Available on: <http://140.120>, 197. 2015.
30. SPSS statistical software (version 17.0, SPSS Inc., Chicago, IL, USA)
31. Sohrabi F, Shishebor P, Saber M, Mosaddegh M. Lethal and sublethal effects of imidacloprid and buprofezin on the sweetpotato whitefly parasitoid *Eretmocerus mundus* (Hymenoptera: Aphelinidae). *Crop Prot*. 2013; 45: 98–103. <https://doi.org/10.1016/j.cropro.2011.05.004>
32. Xiao D, Yang T, Desneux N, Han P, Gao X. Assessment of sublethal and transgenerational effects of pirimicarb on the wheat aphids *Rhopalosiphum padi* and *Sitobion avenae*. *Plos One*. 2015; 10: e0128936. <https://doi.org/10.1371/journal.pone.0128936> PMID: 26121265
33. Ricupero M, Desneux N, Zappalà L, Biondi A. Target and non-target impact of systemic insecticides on a polyphagous aphid pest and its parasitoid. *Chemosphere*. 2020; 247: 125728. <https://doi.org/10.1016/j.chemosphere.2019.125728> PMID: 32069706
34. Wang L. Sublethal effect of tetrachlorantraniliprole on *Plutella xylostella*, Shanxi Agricultural University. 2016 (in Chinese).
35. Lai TC, Su JY. Effects of chlorantraniliprole on development and reproduction of beet armyworm, *Spodoptera exigua* (Hübner). *J Pest Sci*. 2011; 84: 381.
36. Bao H, Liu S, Gu J, Wang X, Liang X, Liu Z. Sublethal effects of four insecticides on the reproduction and wing formation of brown planthopper, *Nilaparvata lugens*. *Pest Manag Sci*. 2010; 65:170–174. <https://doi.org/10.1002/ps.1664> PMID: 18937216
37. Christopher Cutler G, Ramanaidu K, Astatkie T, Isman MB. Green peach aphid, *Myzus persicae* (Hemiptera: Aphididae), reproduction during exposure to sublethal concentrations of imidacloprid and azadirachtin. *Pest Manag Sci*. 2010; 65: 205–209. <https://doi.org/10.1002/ps.1669> PMID: 19089851
38. Hannig GT, Ziegler M, Marçon P.G. Feeding cessation effects of chlorantraniliprole, a new anthranilic-diamide insecticide, in comparison with several insecticides in distinct chemical classes and mode-of-action groups. *Pest Manag Sci*. 2010; 65: 969–974. <https://doi.org/10.1002/ps.1781> PMID: 19449341
39. Tuan SJ, Yeh CC, Atlihan R, Chi H. Linking life table and predation rate for biological control: a comparative study of *Eocanthecona furcellata* (Hemiptera: Pentatomidae) fed on *Spodoptera litura* (Lepidoptera: Noctuidae) and *Plutella xylostella* (Lepidoptera: Plutellidae). *J Econ Entomol*. 2016; 109: 13–24. <https://doi.org/10.1093/jee/fov265> PMID: 26374904
40. Biondi A, Zappalà L, Stark JD, Desneux N. Do biopesticides affect the demographic traits of a parasitoid wasp and its biocontrol services through sublethal effects? *Plos One*. 2013; 8(9): e76548. <https://doi.org/10.1371/journal.pone.0076548> PMID: 24098793
41. Lanka SK, Ottea JA, Beuzelin JM, Stout MJ. Effects of chlorantraniliprole and thiamethoxam rice seed treatments on egg numbers and first instar survival of *Lissorhoptus oryzophilus* (Coleoptera: Curculionidae). *J Econ Entomol*. 2013; 106: 181. <https://doi.org/10.1603/ec12282> PMID: 23448030
42. Saber M, Ahmadi Z, Mahdavinia G. Sublethal effects of spiroticlofen, abamectin and pyridaben on life-history traits and life-table parameters of two-spotted spider mite, *Tetranychus urticae* (Acari: Tetranychidae). *Exp Appl Acarol*. 2018; 75: 1–13. <https://doi.org/10.1007/s10493-018-0252-0> PMID: 29611069
43. Biondi A, Desneux N, Siscaro G, Zappalà L. Using organic-certified rather than synthetic pesticides may not be safer for biological control agents: Selectivity and side effects of 14 pesticides on the predator *Orius laevigatus*. *Chemosphere*. 2012; 87: 803–812. <https://doi.org/10.1016/j.chemosphere.2011.12.082> PMID: 22342338
44. Moscardini VF, Gontijo PC, Michaud JP, Carvalho GA. Sublethal effects of chlorantraniliprole and thiamethoxam seed treatments when *Lysiphlebus testaceipes* feed on sunflower extrafloral nectar. *Biocontrol*. 2014; 59: 503–511. <https://doi.org/10.1007/s10526-014-9588-5>
45. De Castro AA, Corrêa AS, Legaspi JC, Guedes RNC, Serrão JE, Zanuncio JC. Survival and behavior of the insecticide-exposed predators *Podisus nigrispinus* and *Supputius cincticeps* (Heteroptera: Pentatomidae). *Chemosphere*. 2013; 93: 1043–1050. <https://doi.org/10.1016/j.chemosphere.2013.05.075> PMID: 23880241

46. Martinou AF, Seraphides N, Stavrinides MC. Lethal and behavioral effects of pesticides on the insect predator *Macrolophus pygmaeus*. *Chemosphere*. 2014; 96: 167–173. <https://doi.org/10.1016/j.chemosphere.2013.10.024> PMID: 24200046
47. Barbosa PRR, Torres JB, Michaud JP, Rodrigues ARS. High concentrations of chlorantranilprole reduce its compatibility with a key predator, *Hippodamia convergens* (Coleoptera: Coccinellidae). *J Econ Entomol*. 2017; 110(5): 2039–2045. <https://doi.org/10.1093/jee/tox217> PMID: 28961909
48. Cycori M, Markowicz A, Borymski S, Wojcik M, Piotrowska-Seget Z. Imidacloprid induces changes in the structure, genetic diversity and catabolic activity of soil microbial communities. *J Environ Manag*. 2013; 131(DEC.15): 55–65. <https://doi.org/10.1016/j.jenvman.2013.09.041> PMID: 24140487
49. Bezchlebova J, Cernohlavkova J, Kobeticova K, Lana J, Sochova I, Hofman J. Effects of short-chain chlorinated paraffins on soil organisms. *Ecotoxicol Environ Saf*. 2007; 67(2): 206–211. <https://doi.org/10.1016/j.ecoenv.2006.12.015> PMID: 17382391
50. Datta S, Singh J, Singh S, Singh J. Earthworms, pesticides and sustainable agriculture: a review. *Environ Sci Pollut Res* 2016; 23(9): 8227–8243. <https://doi.org/10.1007/s11356-016-6375-0> PMID: 26951221
51. Song P, Ping L, Gao J, Meng X, Zhu J, Wang J. Ecotoxicological effects of fertilizers made from pulping waste liquor on earthworm *Eisenia fetida*. *Ecotoxicol Environ Saf*. 2018; 166: 237–241. <https://doi.org/10.1016/j.ecoenv.2018.09.092> PMID: 30273846
52. Pelosi C, Barot S, Capowiez Y, Hedde M, Vandenbulcke F. Pesticides and earthworms. a review. *Agron Sustain Dev*. 2014; 34(1), 199–228. <https://doi.org/10.1007/s13593-013-0151-z>.
53. Uwizeyimana H, Wang M, Chen WP, Khan K. The eco-toxic effects of pesticide and heavy metal mixtures towards earthworms in soil. *Environ Toxicol Pharmacol*. 2017; 55:20–29. <https://doi.org/10.1016/j.etap.2017.08.001> PMID: 28806580
54. Wang YH, Cang T, Zhao XP, Yu RX, Chen LP, Wu CX, et al. Comparative acute toxicity of twenty-four insecticides to earthworm, *Eisenia fetida*. *Ecotox Environ Safe*. 2012; 79: 122–128. <https://doi.org/10.1016/j.ecoenv.2011.12.016> PMID: 22244824
55. Wang YH, Wu SG, Chen LP, Wu CX, Yu RX, Wang Q, et al. Toxicity assessment of 45 pesticides to the epigeic earthworm *Eisenia fetida*. *Chemosphere*, 2012; 88: 484–491. <https://doi.org/10.1016/j.chemosphere.2012.02.086> PMID: 22459421
56. Mali GV. Toxicological study of bifenthrin and its metabolites on earthworm (*Eisenia fetida*). *Nature Environment and Pollution Technology*. 2019; 18(4): 1387–1391.
